# Supplementary material
Source: PubMed Central journal article supplement (PMC5549861)
Supplement: NIHMS833778-supplement-Supp_material.pdf [file NIHMS833778-supplement-Supp_material.pdf]

## Supplementary Material

**Table S1. Windows of rare variants with statistically significant association with cleft type (CL vs. CLP).**

| <b>Window Range</b>    | <b>Population</b> | <b>Window Type</b> | <b>P-value</b> |
|------------------------|-------------------|--------------------|----------------|
| 1:18943576-18946340    | Philippines       | 20 SNP             | 6.00E-04       |
| 1:18999691-19004690    | Philippines       | 5 KB               | 6.00E-04       |
| 1:19000487-19002797    | Philippines       | 20 SNP             | 4.00E-04       |
| 1:19002191-19007190    | Philippines       | 5 KB               | 3.00E-04       |
| 1:19002383-19004086    | Philippines       | 20 SNP             | 3.00E-04       |
| 1:19004691-19009690    | Philippines       | 5 KB               | 9.00E-04       |
| 1:19005587-19007798    | Philippines       | 20 SNP             | 5.00E-04       |
| 1:95007579-95012578    | China             | 5 KB               | 2.00E-04       |
| 8:129790677-129793236  | Philippines       | 20 SNP             | 8.00E-04       |
| 8:129790773-129795772  | Philippines       | 5 KB               | 6.00E-04       |
| 8:129791975-129794554  | Philippines       | 20 SNP             | 4.50E-04       |
| 8:130298273-130303272  | Philippines       | 5 KB               | 1.00E-04       |
| 8:130300154-130302665  | Philippines       | 20 SNP             | 2.50E-04       |
| 8:130300773-130305772  | Philippines       | 5 KB               | 5.00E-04       |
| 9:100464682-100465908  | China             | 20 SNP             | 2.00E-04       |
| 9:100487529-100492528  | China             | 5 KB               | 3.00E-04       |
| 9:100680029-100685028  | Philippines       | 5 KB               | 2.00E-04       |
| 9:100681080-100683520  | Philippines       | 20 SNP             | 8.00E-04       |
| 10:118459030-118464029 | Philippines       | 5 KB               | 7.00E-04       |
| 10:118653761-118655989 | China             | 20 SNP             | 3.00E-04       |
| 10:118724030-118729029 | Philippines       | 5 KB               | 6.00E-04       |
| 17:8998160-9001204     | China             | 20 SNP             | 7.50E-04       |
| 17:9000016-9005015     | China             | 5 KB               | 1.00E-04       |
| 17:9057516-9062515     | China             | 5 KB               | 7.00E-04       |
| 17:54817004-54818659   | China             | 20 SNP             | 8.00E-04       |

**Table S2. Windows of rare variants with statistically significant association with laterality (unilateral vs. bilateral).**

| <b>Window Range</b>   | <b>Population</b> | <b>Window Type</b> | <b>P-value</b> |
|-----------------------|-------------------|--------------------|----------------|
| 1:94925079-94930078   | Philippines       | 5 KB               | 6.00E-04       |
| 1:94925714-94928273   | Philippines       | 20 SNP             | 4.00E-04       |
| 1:94927110-94929746   | Philippines       | 20 SNP             | 9.00E-04       |
| 1:94981785-94983950   | Philippines       | 20 SNP             | 4.50E-04       |
| 8:129515829-129517924 | Philippines       | 20 SNP             | 7.00E-04       |
| 8:129557483-129559460 | China             | 20 SNP             | 6.00E-04       |
| 8:129575655-129577099 | China             | 20 SNP             | 1.00E-04       |
| 8:129576195-129578952 | China             | 20 SNP             | 4.00E-04       |
| 8:129888186-129889673 | China             | 20 SNP             | < 0.0001       |
| 9:98133816-98138815   | Philippines       | 5 KB               | 7.00E-04       |
| 9:98136401-98138871   | Philippines       | 20 SNP             | 7.00E-04       |
| 9:98148816-98153815   | China             | 5 KB               | 7.00E-04       |
| 9:98149174-98150718   | China             | 20 SNP             | 1.00E-04       |
| 17:9234571-9236098    | China             | 20 SNP             | 6.50E-04       |
| 17:54567773-54572772  | China             | 5 KB               | 1.00E-04       |
| 20:39260700-39265699  | China             | 5 KB               | 3.00E-04       |
| 20:39264089-39265758  | China             | 20 SNP             | 1.00E-04       |

**Table S3. Windows of rare variants with statistically significant association with sex (male vs. female).**

| <b>Window Range</b>    | <b>Population</b> | <b>Window Type</b> | <b>P-value</b> |
|------------------------|-------------------|--------------------|----------------|
| 1:19198100-19199678    | Philippines       | 20 SNP             | 2.00E-04       |
| 1:19199721-19200817    | Philippines       | 20 SNP             | 7.00E-04       |
| 1:94327579-94332578    | China             | 5 KB               | 5.00E-04       |
| 1:94328844-94331028    | China             | 20 SNP             | 5.00E-05       |
| 1:94342579-94347578    | China             | 5 KB               | 9.00E-04       |
| 1:94385079-94390078    | China             | 5 KB               | 8.00E-04       |
| 4:4876429-4878242      | China             | 20 SNP             | 9.50E-04       |
| 8:130028642-130030604  | China             | 20 SNP             | 3.50E-04       |
| 9:100697529-100702528  | Philippines       | 5 KB               | 9.00E-04       |
| 9:100697713-100700826  | Philippines       | 20 SNP             | 9.00E-04       |
| 10:118541530-118546529 | Philippines       | 5 KB               | 3.00E-04       |
| 10:118596325-118598622 | Philippines       | 20 SNP             | 4.00E-04       |
| 10:118624030-118629029 | Philippines       | 5 KB               | 5.00E-04       |
| 10:118625260-118628030 | Philippines       | 20 SNP             | 7.00E-04       |
| 10:118638519-118640461 | Philippines       | 20 SNP             | 1.00E-04       |
| 10:118639030-118644029 | Philippines       | 5 KB               | 2.00E-04       |
| 10:118639485-118641706 | Philippines       | 20 SNP             | < 0.0001       |
| 10:118851530-118856529 | Philippines       | 5 KB               | 2.00E-04       |
| 10:118854083-118856514 | Philippines       | 20 SNP             | 0.00E+00       |
| 10:118854900-118857525 | Philippines       | 20 SNP             | 1.00E-04       |
| 10:123368869-123373868 | Philippines       | 5 KB               | 3.00E-04       |
| 10:123479803-123483275 | Philippines       | 20 SNP             | 8.00E-04       |
| 17:54615714-54618317   | China             | 20 SNP             | 6.00E-04       |
| 17:54766942-54767309   | Philippines       | 20 SNP             | 9.50E-04       |
| 17:54811309-54812853   | Philippines       | 20 SNP             | 4.00E-04       |
| 20:39291288-39293331   | China             | 20 SNP             | 9.00E-04       |
| 20:39444857-39446029   | China             | 20 SNP             | 1.00E-04       |
| 20:39445740-39446718   | China             | 20 SNP             | 6.00E-04       |

**Table S4. Windows of rare variants with statistically significant association with side (unilateral left vs. unilateral right).**

| <b>Window Range</b>    | <b>Population</b> | <b>Window Type</b> | <b>P-value</b> |
|------------------------|-------------------|--------------------|----------------|
| 1:19044691-19049690    | Philippines       | 5 KB               | 3.00E-04       |
| 1:19044786-19046526    | Philippines       | 20 SNP             | 2.50E-04       |
| 1:94745898-94747471    | China             | 20 SNP             | 8.00E-04       |
| 1:94860079-94865078    | Philippines       | 5 KB               | 7.00E-04       |
| 1:94861794-94864557    | Philippines       | 20 SNP             | 5.00E-04       |
| 9:98306107-98308002    | Philippines       | 20 SNP             | 6.50E-04       |
| 9:100631558-100633036  | Philippines       | 20 SNP             | 5.00E-04       |
| 9:100652529-100657528  | China             | 5 KB               | 9.00E-04       |
| 10:123431369-123436368 | Philippines       | 5 KB               | 6.00E-04       |
| 17:54567379-54569266   | Philippines       | 20 SNP             | 2.00E-04       |
| 17:54567773-54572772   | Philippines       | 5 KB               | 6.00E-04       |
| 17:54568409-54570881   | Philippines       | 20 SNP             | 4.00E-04       |
| 20:39231214-39232819   | Philippines       | 20 SNP             | 7.00E-04       |

**Table S5. Modifier association results for laterality (unilateral vs. bilateral) and Transmission/Disequilibrium Test (TDT) results for NSCL/P for variants within *IRF6*.**

| CHR | SNP        | BP        | Minor Allele | Major Allele | OR (modifier) | P-value (modifier) | OR (TDT) | P (TDT)  |
|-----|------------|-----------|--------------|--------------|---------------|--------------------|----------|----------|
| 1   | rs4844895  | 209958580 | C            | T            | 0.6869        | 8.32E-04           | 0.6541   | 2.34E-10 |
| 1   | rs2235372  | 209960436 | A            | G            | 0.6753        | 6.46E-04           | 0.6558   | 9.56E-10 |
| 1   | rs742214   | 209960925 | C            | T            | 0.6899        | 9.13E-04           | 0.6697   | 1.78E-09 |
| 1   | rs742215   | 209961023 | A            | T            | 0.6896        | 9.06E-04           | 0.6721   | 2.56E-09 |
| 1   | rs2073485  | 209962794 | A            | G            | 0.6891        | 8.89E-04           | 0.6697   | 1.97E-09 |
| 1   | rs2235373  | 209963803 | A            | G            | 0.6766        | 5.18E-04           | 0.6613   | 5.96E-10 |
| 1   | rs2235375  | 209965587 | C            | G            | 0.691         | 5.91E-04           | 0.6912   | 1.44E-08 |
| 1   | rs6685182  | 209968319 | A            | C            | 0.698         | 8.31E-04           | 0.6973   | 3.35E-08 |
| 1   | rs2013162  | 209968684 | A            | C            | 0.6869        | 4.84E-04           | 0.6954   | 2.48E-08 |
| 1   | rs2236907  | 209971628 | A            | C            | 0.6947        | 7.18E-04           | 0.6991   | 4.10E-08 |
| 1   | rs2236908  | 209971640 | C            | G            | 0.6872        | 5.07E-04           | 0.6907   | 1.39E-08 |
| 1   | rs2236909  | 209971655 | G            | A            | 0.6917        | 6.15E-04           | 0.6972   | 3.03E-08 |
| 1   | rs2294408  | 209973549 | A            | G            | 0.7005        | 9.52E-04           | 0.6943   | 2.32E-08 |
| 1   | rs2073486  | 209976215 | A            | G            | 0.6837        | 4.22E-04           | 0.6872   | 9.20E-09 |
| 1   | rs2073487  | 209976646 | C            | T            | 0.6776        | 3.07E-04           | 0.6942   | 2.09E-08 |
| 1   | rs17015250 | 209978777 | G            | T            | 0.6887        | 5.19E-04           | 0.6888   | 1.02E-08 |
| 1   | rs12403599 | 209979014 | C            | G            | 0.6895        | 5.52E-04           | 0.6831   | 5.83E-09 |
| 1   | rs7545538  | 209979613 | G            | C            | 0.6832        | 4.16E-04           | 0.6912   | 3.05E-08 |
| 1   | rs7545542  | 209979635 | T            | C            | 0.6744        | 2.75E-04           | 0.6774   | 3.63E-09 |
| 1   | rs2357229  | 209980489 | T            | G            | 0.6801        | 3.85E-04           | 0.6798   | 5.18E-09 |
| 1   | rs1005287  | 209980757 | A            | G            | 0.6928        | 6.48E-04           | 0.6849   | 7.20E-09 |
| 1   | rs6540559  | 209982025 | A            | G            | 0.6572        | 2.17E-04           | 0.6606   | 7.01E-10 |
| 1   | rs6696825  | 209982372 | G            | A            | 0.6715        | 3.80E-04           | 0.6679   | 1.42E-09 |
| 1   | rs6659367  | 209982408 | T            | G            | 0.6649        | 3.00E-04           | 0.6667   | 1.97E-09 |
| 1   | rs764093   | 209983331 | G            | A            | 0.6765        | 4.77E-04           | 0.6631   | 6.77E-10 |
| 1   | rs12070337 | 209992127 | A            | G            | 0.6901        | 8.82E-04           | 0.6679   | 1.42E-09 |
